# Supplementary material for: Povidone-iodine-functionalized fluorinated copolymers with dual-functional antibacterial and antifouling activities
Source: Royal Society of Chemistry journal article supplement (doi:10.1039/c9bm00583h), 2019-01-01
Supplement: c9bm00583h1.pdf [file c9bm00583h1.pdf]

## Supporting Information

### **Povidone-Iodine-Functionalized Fluorinated Copolymers with Dual-Functional Antibacterial and Antifouling Activities**

Qinggele Borjihan,<sup>a#</sup> Jiebing Yang,<sup>b#</sup> Qing Song,<sup>c</sup> Lingling Gao,<sup>c,d</sup> Miao Xu,<sup>c,d</sup> Tianyi Gao,<sup>a</sup> Wenxin Liu,<sup>a</sup> Peng Li,<sup>\*c,d</sup> Quanshun Li,<sup>\*b</sup> and Alideertu Dong,<sup>\*a</sup>

<sup>a</sup>College of Chemistry and Chemical Engineering, Inner Mongolia University, Hohhot 010021, People's Republic of China

<sup>b</sup>Key Laboratory for Molecular Enzymology and Engineering of Ministry of Education, School of Life Sciences, Jilin University, Changchun 130012, People's Republic of China

<sup>c</sup>Xi'an Institute of Flexible Electronics & Xi'an Institute of Biomedical Materials Engineering, Northwestern Polytechnical University (NPU), 127 West Youyi Road, Xi'an 710072, China.

<sup>d</sup>Key Laboratory of Flexible Electronics (KLOFE) and Institute of Advanced Materials (IAM) Jiangsu National Synergetic Innovation Center for Advanced Materials (SICAM), Nanjing Tech University, Nanjing, 211816, China.

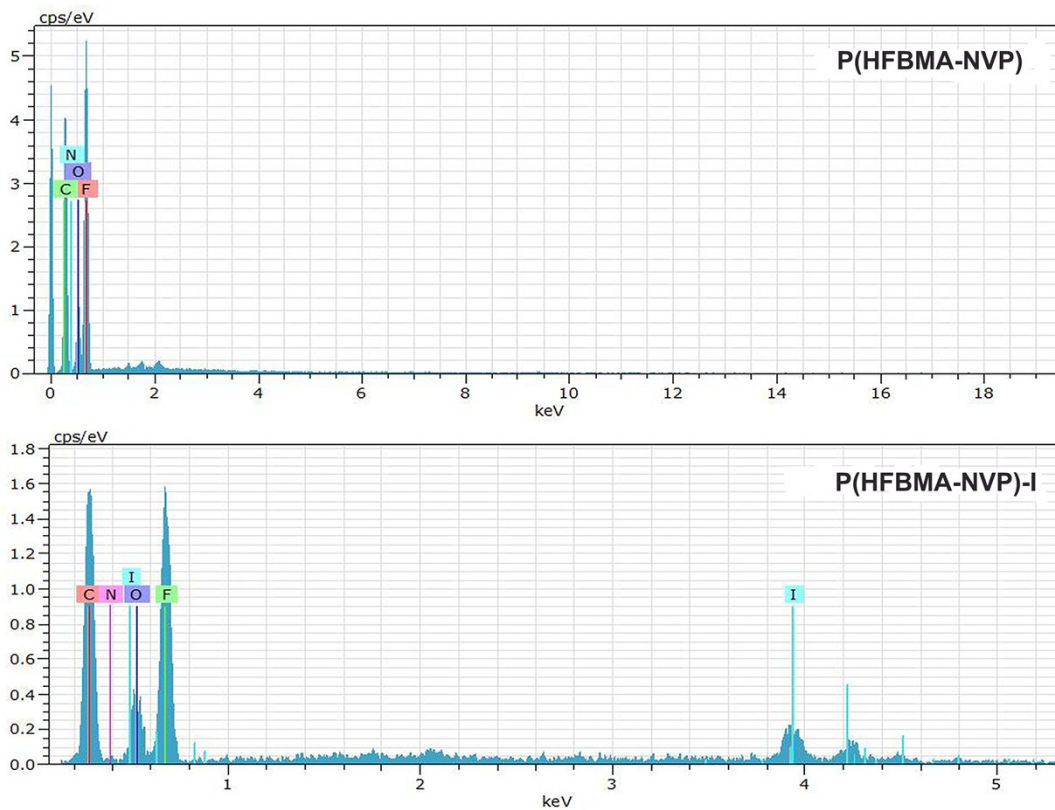

**Fig. S1** EDX spectra of P(HFBMA-NVP) and P(HFBMA-NVP)-I.

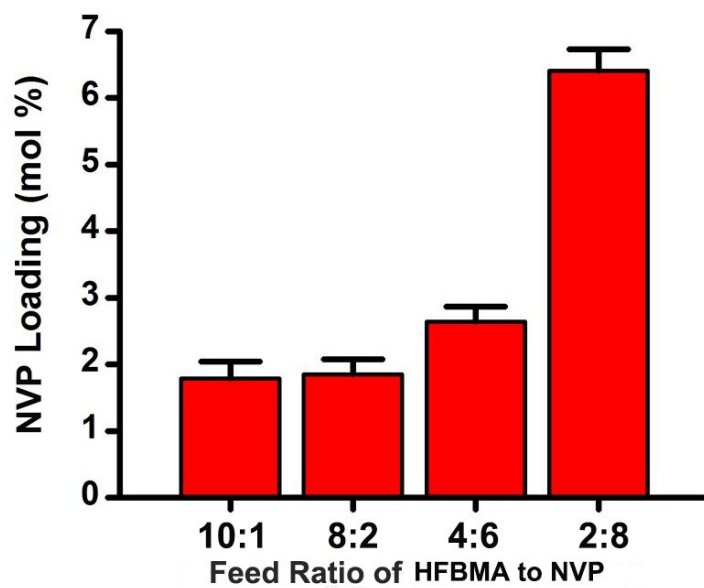

**Fig. S2** Molar content of NVP loading in P(HFBMA-NVP) prepared at different feed ratios.

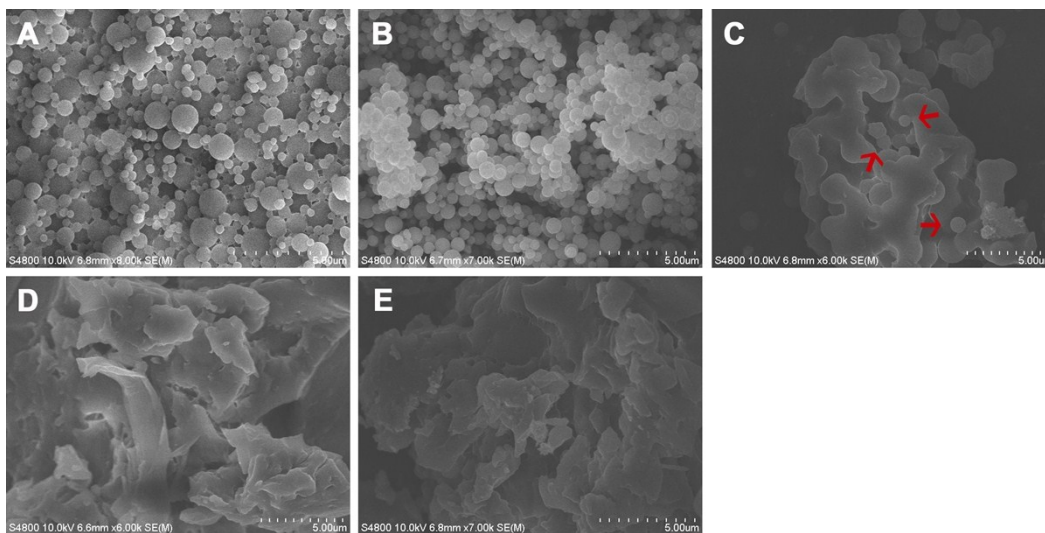

**Fig. S3** SEM images of (A) pristine PHFBMA, P(HFBMA-NVP) prepared at the feed ratios of (B) 10: 1, (C) 4:6, and (D) 2:8, and (E) P(HFBMA-NVP)-I.

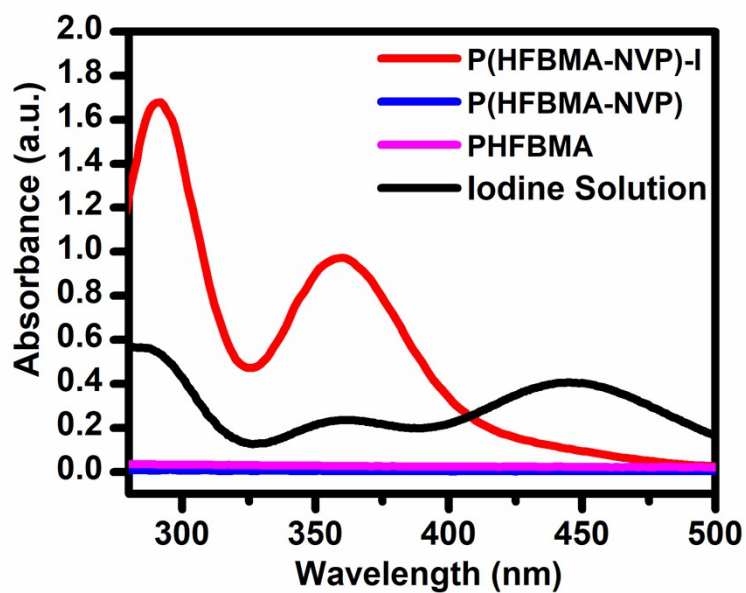

**Fig. S4** UV-vis spectra of P(HFBMA), P(HFBMA-NVP), P(HFBMA-NVP)-I and iodine solution.
